# Supplementary material for: Highly transparent and flame-retardant epoxy composites based on a hybrid multi-element containing POSS derivative
Source: Royal Society of Chemistry journal article supplement (doi:10.1039/c7ra09327f), 2017-01-01
Supplement: c7ra09327f1.pdf [file c7ra09327f1.pdf]

**Highly transparent and flame-retardant epoxy composites based on a hybrid multi-element contained POSS derivative**

Cheng Liu, Ting Chen, Conghui Yuan, Ying Chang, Guorong Chen, Birong Zeng,  
Yiting Xu, Weiang Luo, Lizong Dai\*

Fujian Provincial Key Laboratory of Fire Retardant Materials, College of  
Materials, Xiamen University, Xiamen 361005, People's Republic of China

\*Corresponding author, E-mail address: [lzdai@xmu.edu.cn](mailto:lzdai@xmu.edu.cn)

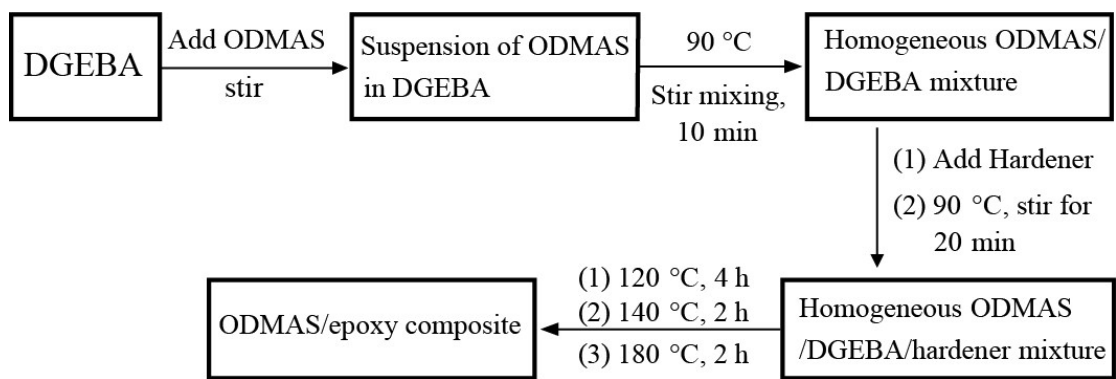

Figure S 1. Schematic illustration of the preparation of ODMAS/epoxy nanocomposites.

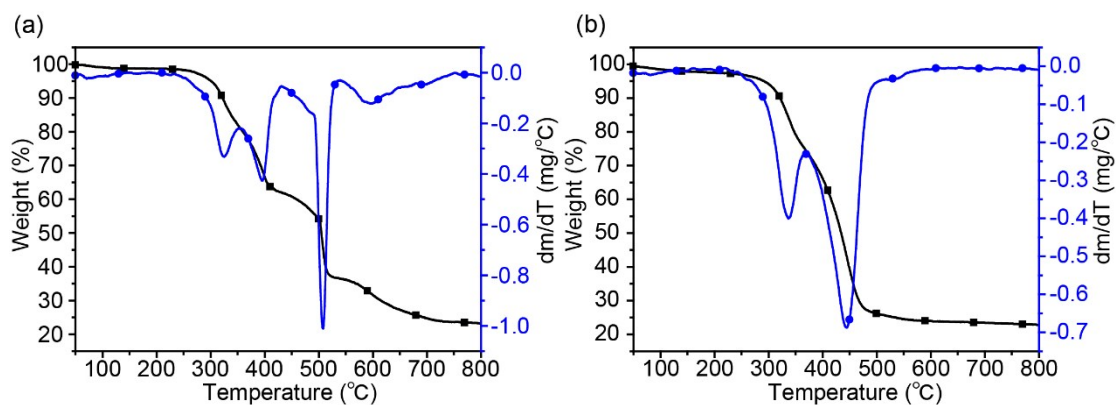

Figure S 2. TGA and DTG curves of ODMAS in (a) air atmosphere, (b) nitrogen atmosphere, heating rate  $10\text{ }^{\circ}\text{Cmin}^{-1}$ .

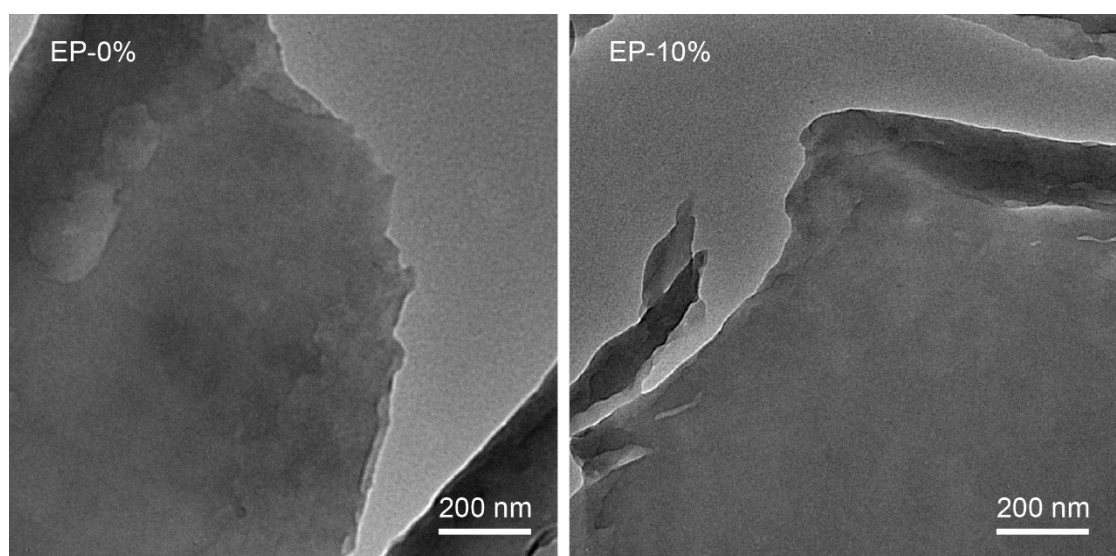

Figure S 3. TEM images of EP-0% and EP-10%.

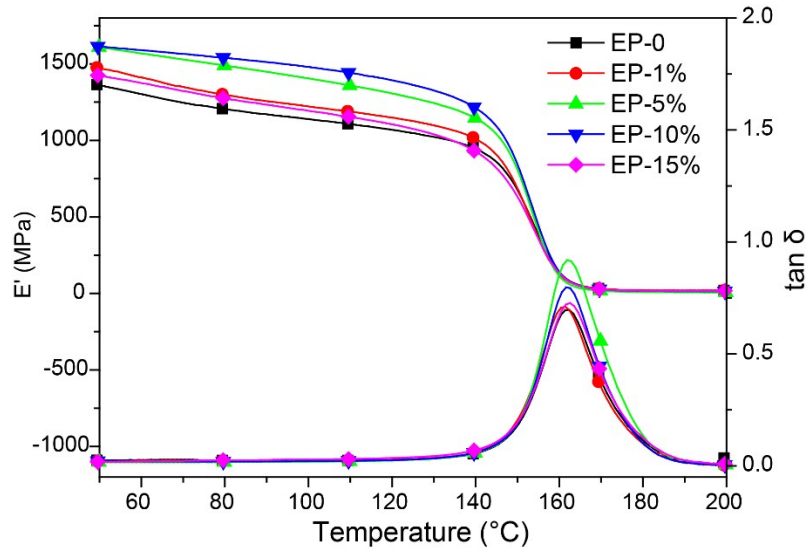

Figure S 4. Variations storage modulus and  $\tan \delta$  versus temperature of cured epoxy resin and ODMAS/EP.

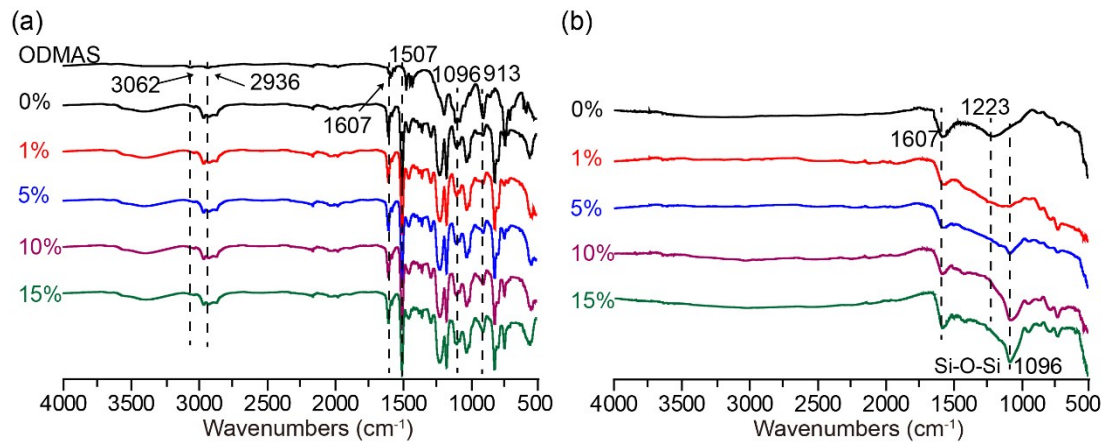

Figure S 5. FT-IR spectra of composites with vary ODMAS contents (a) and that of corresponding char residues (b).

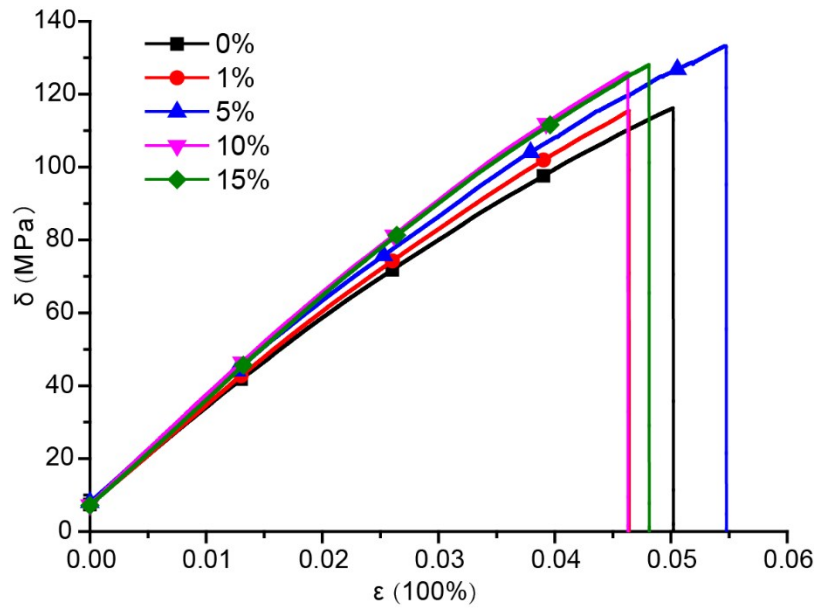

Figure S 6. The  $\sigma$ -  $\epsilon$  curves of various ODMAS/EP systems.
